# Supplementary material for: SARS-CoV-2 breakthrough infections induce somatically hypermutated broadly neutralizing antibodies against heterologous variants
Source: Research Square preprint supplement (doi:10.21203/rs.3.rs-1739426/v1), 2022-06-29
Supplement: Supplementary file 1 [file a520d9e8a882ff4379fdb5e6.xlsx]

## Sheet: Table S1
Table S2. Characteristics of 270 selected antibodies.
	NM	Antibody	ELISA(OD450)		Frequency	Isotype	Heavy chain			Light chain
			Delta-RBD	Delta-S1			V Gene	J Gene	SHM rate	V Gene	J Gene	SHM rate
	1	YB6-1	0.859	/	7	IGHG1	IGHV2-26	IGHJ4	0.00738916	IGKV1-39	IGKJ1	0.0539084
	2	YB6-2	0.1315	/	2	IGHG1	IGHV3-74	IGHJ5	0.201087	IGLV1-40	IGLJ3	0.0482233
	3	YB6-3	0.1037	/	1	IGHG1	IGHV1-2	IGHJ4	0.394015	IGKV1-39	IGKJ1	0.107969
	4	YB6-4	0.1301	/	1	IGHG1	IGHV3-30	IGHJ3	0.316527	IGKV3-20	IGKJ4	0.313984
	5	YB6-5	0.0652	/	1	IGHG1	IGHV3-23	IGHJ4	0.276808	IGLV1-40	IGLJ3	0.0858726
	6	YB6-6	0.071	/	1	IGHG1	IGHV3-23	IGHJ4	0.276808	IGKV1-5	IGKJ2	0.0614973
	7	YB6-7	0.077	/	1	IGHG1	IGHV3-64	IGHJ4	0.19403	IGKV4-1	IGKJ4	0.335013
	8	YB5-8	0.0687	/	3	IGHG1	IGHV2-5	IGHJ5	0.110024	IGKV3-20	IGKJ2	0.0206718
	9	YB5-9	0.0347	/	2	IGHG1	IGHV3-23	IGHJ4	0.154472	IGKV3-20	IGKJ4	0
	10	YB5-10	0.0366	/	1	IGHG1	IGHV3-11	IGHJ4	0.586387	IGLV2-14	IGLJ2	0.110236
	11	YB5-11	0.0816	/	1	IGHG1	IGHV3-11	IGHJ4	0.586387	IGKV3-20	IGKJ2	0.0206718
	12	YB5-12	0.0867	/	1	IGHG1	IGHV3-23	IGHJ4	0.308642	IGKV3-15	IGKJ2	0.0364583
	13	YB5-13	0.1366	/	1	IGHG1	IGHV3-33	IGHJ4	0.184524	IGLV1-44	IGLJ1	0.565217
	14	YB4-14	0.0832	/	1	IGHG1	IGHV3-33	IGHJ6	0.102244	IGKV1-8	IGKJ4	0.15562
	15	YB4-15	0.0826	/	2	IGHG1	IGHV3-23	IGHJ4	0.0897756	IGKV1-8	IGKJ2	0.116071
	16	YB4-16	0.1466	/	3	IGHG1	IGHV4-34	IGHJ4	0.124105	IGLV1-47	IGLJ3	0.106952
	17	YB4-17	0.0764	/	1	IGHG1	IGHV3-23	IGHJ4	0.150838	IGKV4-1	IGKJ4	0.0944444
	18	YB4-18	0.1334	/	1	IGHG1	IGHV3-23	IGHJ4	0.16792	IGKV1-8	IGKJ2	0.0870787
	19	YB4-19	0.0636	/	2	IGHG1	IGHV3-20	IGHJ4	0.203966	IGKV3-20	IGKJ2	0.0350404
	20	YB4-20	0.113	/	2	IGHG1	IGHV3-23	IGHJ4	0.12782	IGKV3-11	IGKJ5	0.0313316
	21	YB4-21	0.2088	/	2	IGHG1	IGHV3-23	IGHJ4	0.0349127	IGLV3-25	IGLJ2	0.0293333
	22	YB4-22	0.0833	/	2	IGHG1	IGHV3-33	IGHJ4	0.173804	IGKV1-9	IGKJ4	0.0257732
	23	YB4-23	0.4122	/	1	IGHG1	IGHV4-38-2	IGHJ2	0.430769	IGLV1-51	IGLJ2	0.0240642
	24	YB4-24	0.0634	/	36	IGHG1	IGHV3-33	IGHJ6	0.0410628	IGLV3-21	IGLJ2	0.0104987
	25	YB4-25	1.308	/	2	IGHG1	IGHV3-23	IGHJ3	0.0272953	IGKV1-33	IGKJ5	0.00514139
	26	YB4-26	1.3887	/	2	IGHG1	IGHV4-39	IGHJ5	0.287059	IGLV1-44	IGLJ3	0.00511509
	27	YB3-27	0.0668	/	1	IGHG1	IGHV3-21	IGHJ4	0.107232	IGLV3-25	IGLJ2	0.112
	28	YB3-28	0.0696	/	1	IGHG1	IGHV1-18	IGHJ3	0.253012	IGKV3-15	IGKJ1	0.0939948
	29	YB3-29	0.075	/	2	IGHG1	IGHV3-23	IGHJ5	0.171355	IGKV1-27	IGKJ3	0.0616967
	30	YB3-30	0.7706	/	1	IGHG1	IGHV3-7	IGHJ3	0.270833	IGLV3-19	IGLJ2	0.0613333
	31	YB3-31	0.0539	/	3	IGHG1	IGHV3-11	IGHJ2	0.0591133	IGLV3-1	IGLJ1	0.0520548
	32	YB3-32	0.1764	/	2	IGHG1	IGHV3-23	IGHJ4	0.109726	IGLV4-69	IGLJ3	0.04534
	33	YB3-33	0.083	/	3	IGHG1	IGHV3-33	IGHJ4	0.00498753	IGLV2-14	IGLJ1	0.010582
	56	YB5-56	0.1142	0.0645	2	IGHG1	IGHV1-69D	IGHJ5	0.0495049	IGKV3-15	IGKJ3	0.0443864
	57	YB5-57	0.0813	/	2	IGHG1	IGHV1-8	IGHJ4	0.0523691	IGKV1-16	IGKJ3	0.0514139
	58	YB5-58	0.0834	0.0895	2	IGHG1	IGHV2-5	IGHJ4	0.0197044	IGKV1D-39	IGKJ2	0.0637755
	59	YB5-59	0.0861	/	1	IGHG1	IGHV3-23	IGHJ4	0.14433	IGKV1-33	IGKJ5	0.0514139
	60	YB5-60	1.4924	2.3995	1	IGHG1	IGHV3-33	IGHJ2	0.0591133	IGLV2-14	IGLJ2	0.023622
	61	YB5-61	0.1034	0.062	1	IGHG1	IGHV3-43	IGHJ6	0.141414	IGKV1D-39	IGKJ2	0.0637755
	62	YB5-62	0.1255	1.0185	2	IGHG1	IGHV3-43	IGHJ2	0.0465686	IGKV1-9	IGKJ3	0.0359897
	63	YB5-63	1.2903	2.2925	1	IGHG1	IGHV4-39	IGHJ5	0.131455	IGKV1-5	IGKJ2	0.0358974
	64	YB5-64	1.3062	0.0605	2	IGHG1	IGHV5-51	IGHJ2	0.153086	IGKV1-33	IGKJ3	0.0694087
	65	YB5-65	0.1634	0.0615	1	IGHG1	IGHV3-53	IGHJ4	0.0653266	IGKV2-30	IGKJ4	0.0201511
	66	YB5-66	0	/	1	IGHG1	IGHV3-66	IGHJ4	0.135678	IGKV1D-17	IGKJ2	0.0461538
	67	YB3-67	0.952	0.065	1	IGHG1	IGHV3-53	IGHJ4	0.147668	IGKV1-5	IGKJ1	0.0462725
	68	YB3-68	1.3408	2.615	1	IGHG1	IGHV3-66	IGHJ6	0.0525	IGKV1-33	IGKJ3	0.0179949
	69	YB6-69	1.2	0.084	1	IGHG1	IGHV3-23	IGHJ4	0.276808	IGLV2-14	IGLJ3	0.0411311
	70	YB6-70	0.1194	0.063	1	IGHG1	IGHV3-33	IGHJ4	0.172932	IGLV1-51	IGLJ3	0.0613811
	71	YB6-71	0.3112	0.0685	1	IGHG1	IGHV3-33	IGHJ4	0.0895141	IGKV3-11	IGKJ1	0.0926431
	72	YB6-72	0.1792	0.125	1	IGHG1	IGHV3-66	IGHJ6	0.163017	IGKV3-20	IGKJ3	0.0207254
	73	YB7-73	0.0708	/	1	IGHG1	IGHV3-11	IGHJ4	0.192982	IGKV2-28	IGKJ3	0.0382653
	74	YB7-74	0.0648	/	1	IGHG1	IGHV3-15	IGHJ4	0.180328	IGKV1-17	IGKJ2	0.0179487
	75	YB7-75	0.0661	/	1	IGHG1	IGHV3-23	IGHJ4	0.21131	IGLV4-69	IGLJ2	0.0957179
	76	YB7-76	0.0983	/	1	IGHG1	IGHV3-23	IGHJ6	0.136816	IGKV3-20	IGKJ4	0.0233766
	77	YB7-77	0.0572	/	1	IGHG1	IGHV3-33	IGHJ4	0.280702	IGLV4-69	IGLJ2	0.0428212
	78	YB7-78	0.1012	0.062	2	IGHG1	IGHV3-33	IGHJ4	0.236364	IGKV1-39	IGKJ1	0.118252
	79	YB7-79	0.0584	/	1	IGHG1	IGHV3-53	IGHJ4	0.183938	IGKV2D-28	IGKJ2	0.0261097
	80	YB7-80	0.1176	0.421	1	IGHG1	IGHV3-74	IGHJ4	0.175287	IGKV2-30	IGKJ1	0.040201
	81	YB7-81	0.0495	/	1	IGHG1	IGHV5-51	IGHJ3	0.151741	IGKV3-15	IGKJ1	0.0443864
	82	YB8-82	0.0597	/	3	IGHG1	IGHV1-3	IGHJ3	0.0868486	IGKV3-20	IGKJ1	0.0414508
	83	YB8-83	2.7929	2.745	2	IGHG1	IGHV1-46	IGHJ5	0.0371287	IGKV3-11	IGKJ3	0.0104439
	84	YB8-84	0.0871	/	2	IGHG1	IGHV1-69D	IGHJ4	0.0822943	IGLV1-51	IGLJ3	0.0230179
	85	YB8-85	1.5552	0.0695	1	IGHG1	IGHV3-23	IGHJ3	0.45	IGKV1-5	IGKJ2	0.0512821
	86	YB8-86	0.0681	/	1	IGHG1	IGHV3-23	IGHJ4	0.172932	IGKV1-16	IGKJ4	0.0578512
	87	YB8-87	0.0607	/	1	IGHG1	IGHV3-33	IGHJ4	0.122807	IGKV1-33	IGKJ4	0.0257732
	88	YB8-88	0.0602	/	2	IGHG1	IGHV3-33	IGHJ4	0.0989011	IGLV2-11	IGLJ2	0.0656168
	89	YB8-89	0.07	/	2	IGHG1	IGHV3-33	IGHJ4	0.0904393	IGKV4-1	IGKJ1	0.00498753
	90	YB8-90	0.0737	/	1	IGHG1	IGHV3-66	IGHJ6	0.125749	IGKV1-33	IGKJ2	0.0512821
	91	YB8-91	0.1174	0.406	3	IGHG1	IGHV4-61	IGHJ4	0.029703	IGKV4-1	IGKJ1	0.00498753
	92	YB9-92	0.7407	0.066	3	IGHG1	IGHV1-2	IGHJ6	0.0697674	IGKV1-5	IGKJ1	0.0282776
	93	YB9-93	0.2893	0.1325	2	IGHG1	IGHV1-24	IGHJ4	0.10567	IGLV3-10	IGLJ3	0.0233766
	94	YB9-94	0.0684	/	2	IGHG1	IGHV1-3	IGHJ5	0.15051	IGKV1-5	IGKJ1	0.0385604
	95	YB9-95	0.1018	0.058	2	IGHG1	IGHV1-46	IGHJ5	0.0742574	IGLV3-1	IGLJ1	0.0570652
	96	YB9-96	0.1512	0.0615	2	IGHG1	IGHV1-69D	IGHJ4	0.145363	IGKV2-28	IGKJ2	0.0275689
	97	YB9-97	0.6024	0.1105	2	IGHG1	IGHV2-5	IGHJ4	0.08867	IGKV1-39	IGKJ1	0.0565553
	98	YB9-98	0.4693	1.8925	1	IGHG1	IGHV2-70	IGHJ4	0.121287	IGKV1-27	IGKJ1	0.0411311
	99	YB9-99	0.1287	0.086	5	IGHG1	IGHV3-15	IGHJ4	0.153374	IGLV2-14	IGLJ2	0.0803324
	100	YB9-100	0.2024	0.0805	1	IGHG1	IGHV3-23	IGHJ6	0.476998	IGKV2-28	IGKJ1	0.0603015
	101	YB9-101	0.5085	2.5135	1	IGHG1	IGHV3-23	IGHJ4	0.157895	IGLV3-10	IGLJ2	0.0441558
	102	YB9-102	2.6638	2.7805	4	IGHG1	IGHV3-23	IGHJ4	0.0648379	IGKV1-12	IGKJ1	0.0231362
	103	YB9-103	0.0887	/	2	IGHG1	IGHV3-30	IGHJ4	0.108312	IGKV4-1	IGKJ4	0.0175
	104	YB9-104	0.3657	0.114	1	IGHG1	IGHV3-33	IGHJ4	0.182957	IGLV2-14	IGLJ2	0.0659341
	105	YB9-105	0.3045	0.0895	1	IGHG1	IGHV3-33	IGHJ4	0.150376	IGLV3-21	IGLJ2	0.0597826
	106	YB9-106	0.1981	2.663	1	IGHG1	IGHV3-33	IGHJ6	0.149758	IGKV3-20	IGKJ3	0.0259067
	107	YB9-107	0.1337	0.074	1	IGHG1	IGHV3-33	IGHJ4	0.141058	IGKV2D-40	IGKJ4	0.0199005
	108	YB9-108	0.9972	1.862	3	IGHG1	IGHV3-33	IGHJ2	0.133995	IGKV3-20	IGKJ1	0.0310881
	109	YB9-109	0.0718	/	1	IGHG1	IGHV3-43	IGHJ4	0.133333	IGKV3-15	IGKJ2	0.0260417
	110	YB9-110	0.1397	0.0655	1	IGHG1	IGHV3-48	IGHJ4	0.178571	IGKV1-33	IGKJ2	0.110256
	111	YB9-111	0.0961	/	1	IGHG1	IGHV3-49	IGHJ5	0.166667	IGKV1-16	IGKJ2	0.0567568
	112	YB9-112	2.6114	2.675	3	IGHG1	IGHV3-53	IGHJ6	0.0495049	IGKV1-9	IGKJ5	0.0102828
	113	YB9-113	0.0559	/	1	IGHG1	IGHV3-7	IGHJ6	0.431884	IGLV2-23	IGLJ3	0.0582011
	114	YB9-114	0.0582	/	1	IGHG1	IGHV3-7	IGHJ6	0.431884	IGLV2-14	IGLJ1	0.0725806
	115	YB9-115	0.084	/	1	IGHG1	IGHV3-74	IGHJ4	0.13555	IGLV2-14	IGLJ1	0.0493151
	116	YB9-116	0.0699	/	1	IGHG1	IGHV4-30-4	IGHJ5	0.202073	IGKV2D-28	IGKJ3	0.0678392
	117	YB9-117	0.0628	/	1	IGHG1	IGHV4-34	IGHJ1	0.0716113	IGKV1-27	IGKJ4	0.0541237
	118	YB9-118	0.0918	/	1	IGHG1	IGHV4-39	IGHJ5	0.315294	IGLV1-51	IGLJ2	0.028133
	119	YB9-119	0.0756	/	2	IGHG1	IGHV4-39	IGHJ5	0.260664	IGKV1-8	IGKJ4	0.128655
	120	YB9-120	2.8208	2.825	4	IGHG1	IGHV4-4	IGHJ4	0.120301	IGLV2-14	IGLJ2	0.0396825
	121	YB9-121	0.0571	/	2	IGHG1	IGHV4-59	IGHJ5	0.136598	IGLV3-21	IGLJ2	0.0473538
	122	YB9-122	0.0727	/	1	IGHG1	IGHV4-61	IGHJ4	0.130435	IGKV1-8	IGKJ2	0.12844
	123	YB9-123	0.0713	/	3	IGHG1	IGHV5-51	IGHJ5	0.237226	IGKV1-9	IGKJ3	0.077135
	124	YB10-124	0.0635	/	2	IGHG1	IGHV1-18	IGHJ4	0.187179	IGKV3-15	IGKJ5	0.0443864
	125	YB10-125	0.0664	/	2	IGHG1	IGHV1-18	IGHJ4	0.074813	IGKV3-20	IGKJ2	0.0439276
	126	YB10-126	0.3879	2.344	4	IGHG1	IGHV1-18	IGHJ6	0.0151133	IGKV1-5	IGKJ2	0.0153846
	127	YB10-127	1.4357	0.133	1	IGHG1	IGHV1-2	IGHJ4	0.130326	IGLV3-10	IGLJ3	0.025974
	128	YB10-128	0.2015	0.055	1	IGHG1	IGHV1-3	IGHJ4	0.250627	IGLV3-19	IGLJ2	0.064
	129	YB10-129	0.2011	0.0585	6	IGHG1	IGHV1-46	IGHJ4	0.328283	IGLV2-11	IGLJ3	0.0619718
	130	YB10-130	0.1982	0.0535	2	IGHG1	IGHV1-69D	IGHJ4	0.362606	IGKV1D-39	IGKJ5	0.0741688
	131	YB10-131	0.116	0.0545	2	IGHG1	IGHV1-69D	IGHJ4	0.105128	IGKV1-12	IGKJ2	0.0871795
	132	YB10-132	0.1044	0.052	1	IGHG1	IGHV2-26	IGHJ6	0.0621302	IGKV4-1	IGKJ4	0.0325
	133	YB10-133	0.057	/	1	IGHG1	IGHV2-5	IGHJ2	0.170732	IGKV1D-39	IGKJ2	0.0739796
	134	YB10-134	0.4876	0.051	1	IGHG1	IGHV2-70	IGHJ6	0.0475059	IGLV2-23	IGLJ2	0.042328
	135	YB10-135	0.1254	0.053	2	IGHG1	IGHV3-11	IGHJ4	0.147287	IGKV3-20	IGKJ2	0.0214477
	136	YB10-136	2.5938	2.115	3	IGHG1	IGHV3-13	IGHJ2	0.0297767	IGKV1D-39	IGKJ5	0.0153453
	137	YB10-137	0.1933	0.065	2	IGHG1	IGHV3-21	IGHJ2	0.195195	IGLV3-19	IGLJ1	0.127841
	138	YB10-138	0.4278	0.058	2	IGHG1	IGHV3-21	IGHJ4	0.0448878	IGKV4-1	IGKJ1	0.0299252
	139	YB10-139	1.5413	0.0535	2	IGHG1	IGHV3-23	IGHJ4	0.320802	IGKV3-15	IGKJ1	0.0704961
	140	YB10-140	0.2261	0.0545	2	IGHG1	IGHV3-23	IGHJ2	0.172932	IGKV3-15	IGKJ3	0.0156658
	141	YB10-141	0.3897	0.054	2	IGHG1	IGHV3-23	IGHJ1	0.0493827	IGLV3-21	IGLJ3	0.0385604
	142	YB10-142	0.09	/	2	IGHG1	IGHV3-30	IGHJ4	0.186398	IGKV4-1	IGKJ2	0.0405063
	143	YB10-143	0.0459	/	2	IGHG1	IGHV3-30	IGHJ6	0.0373134	IGLV3-25	IGLJ3	0.0186667
	144	YB10-144	0.0979	/	1	IGHG1	IGHV3-33	IGHJ3	0.533133	IGKV6-21	IGKJ1	0.0289474
	145	YB10-145	0.1024	0.062	2	IGHG1	IGHV3-33	IGHJ4	0.110825	IGKV3-11	IGKJ3	0.0156658
	146	YB10-146	0.0967	/	2	IGHG1	IGHV3-33	IGHJ4	0.0651629	IGLV1-47	IGLJ2	0.0462725
	147	YB10-147	0.0907	/	1	IGHG1	IGHV3-43	IGHJ4	0.167568	IGLV3-10	IGLJ3	0.0441176
	148	YB10-148	1.196	0.054	3	IGHG1	IGHV3-43	IGHJ4	0.101737	IGLV1-47	IGLJ2	0.0385604
	149	YB10-149	0.0733	/	2	IGHG1	IGHV3-43	IGHJ3	0.0592593	IGKV1-12	IGKJ4	0.0489691
	150	YB10-150	0.0898	/	1	IGHG1	IGHV3-48	IGHJ6	0.155	IGLV1-44	IGLJ2	0.0332481
	151	YB10-151	0.3117	2.205	2	IGHG1	IGHV3-48	IGHJ4	0.125313	IGLV3-25	IGLJ1	0.016
	152	YB10-152	0.0815	/	2	IGHG1	IGHV3-49	IGHJ4	0.0918635	IGKV3-20	IGKJ4	0.0233766
	153	YB10-153	0.0606	/	2	IGHG1	IGHV3-53	IGHJ4	0.121762	IGKV2D-29	IGKJ2	0.075188
	154	YB10-154	0.1053	0.054	2	IGHG1	IGHV3-53	IGHJ3	0.1175	IGLV2-14	IGLJ3	0.0720222
	155	YB10-155	0.0915	/	1	IGHG1	IGHV3-7	IGHJ4	0.180879	IGKV2-30	IGKJ2	0.0426065
	156	YB10-156	0.2024	0.0555	1	IGHG1	IGHV3-74	IGHJ6	0.142857	IGKV3-15	IGKJ4	0.0340314
	157	YB10-157	0.8878	0.052	1	IGHG1	IGHV4-30-4	IGHJ4	0.121827	IGKV1-5	IGKJ4	0.0180412
	158	YB10-158	0.0753	/	2	IGHG1	IGHV4-34	IGHJ6	0.0653753	IGKV1D-39	IGKJ1	0.0588235
	159	YB10-159	0.0694	/	2	IGHG1	IGHV4-39	IGHJ4	0.0668317	IGKV1-33	IGKJ4	0.0128866
	160	YB10-160	0.0717	/	2	IGHG1	IGHV4-39	IGHJ3	0.0351288	IGLV2-23	IGLJ3	0.0132275
	161	YB10-161	0.0718	/	1	IGHG1	IGHV4-59	IGHJ6	0.269841	IGKV1-33	IGKJ2	0.0740741
	162	YB10-162	0.1177	0.053	1	IGHG1	IGHV4-59	IGHJ5	0.20802	IGKV4-1	IGKJ1	0.0673317
	163	YB10-163	0.0874	/	2	IGHG1	IGHV4-61	IGHJ4	0.129412	IGLV4-60	IGLJ3	0.0375
	164	YB10-164	0.0584	/	2	IGHG1	IGHV4-61	IGHJ4	0.114213	IGKV1-NL1	IGKJ2	0.0216802
	165	YB10-165	0.101	0.056	2	IGHG1	IGHV5-51	IGHJ4	0.539241	IGLV2-11	IGLJ3	0.0378378
	166	YB10-166	0.0608	/	2	IGHG1	IGHV5-51	IGHJ5	0.151007	IGKV2-30	IGKJ4	0.02267
	167	YB10-167	0.0907	/	2	IGHG1	IGHV5-51	IGHJ5	0.109453	IGLV3-1	IGLJ1	0.0234375
	168	YB10-168	0.135	0.0705	1	IGHG1	IGHV6-1	IGHJ4	0.080292	IGLV2-14	IGLJ3	0.0597403
	169	YB10-169	0.0749	/	2	IGHG1	IGHV6-1	IGHJ6	0.0584112	IGKV1-5	IGKJ4	0.0180412
	170	YB10-170	0.0482	/	1	IGHG1	IGHV7-4-1	IGHJ5	0.121891	IGLV2-14	IGLJ2	0.037594
	171	YB11-171	0.1121	0.055	2	IGHG1	IGHV1-46	IGHJ4	0.22	IGLV2-23	IGLJ3	0.0608466
	172	YB11-172	0.0746	/	2	IGHG1	IGHV1-69D	IGHJ5	0.227564	IGLV5-45	IGLJ2	0.118687
	173	YB11-173	0.066	/	2	IGHG1	IGHV3-23	IGHJ5	0.0990099	IGKV2D-28	IGKJ4	0.0377834
	174	YB11-174	0.0549	/	2	IGHG1	IGHV3-30	IGHJ4	0.0823171	IGLV6-57	IGLJ2	0.0511509
	175	YB11-175	0.0507	/	2	IGHG1	IGHV3-48	IGHJ4	0.113695	IGKV3-11	IGKJ3	0.0156658
	176	YB11-176	0.0747	/	2	IGHG1	IGHV3-53	IGHJ6	0.150852	IGKV1D-39	IGKJ2	0.0459184
	177	YB11-177	0.0764	/	5	IGHG1	IGHV3-7	IGHJ3	0.114144	IGLV2-8	IGLJ1	0.0357143
	178	YB11-178	0.0617	/	2	IGHG1	IGHV4-34	IGHJ2	0.0990566	IGLV2-14	IGLJ1	0.0570652
	179	YB11-179	0.0824	/	2	IGHG1	IGHV4-34	IGHJ4	0.0763723	IGKV3-11	IGKJ4	0.0340314
	180	YB11-180	0.0923	/	3	IGHG1	IGHV4-39	IGHJ4	0.0658824	IGKV1-12	IGKJ4	0.0257732
	181	YB11-181	0.0561	/	1	IGHG1	IGHV5-51	IGHJ4	0.152672	IGLV3-19	IGLJ2	0.064
	182	YB12-182	0.0689	/	2	IGHG1	IGHV1-18	IGHJ4	0.0448878	IGLV2-23	IGLJ1	0.010582
	183	YB12-183	0.0639	/	3	IGHG1	IGHV1-18	IGHJ3	0.0248139	IGKV3-15	IGKJ1	0.0130548
	184	YB12-184	0.0973	/	2	IGHG1	IGHV1-24	IGHJ6	0.0228426	IGLV4-69	IGLJ3	0.0251889
	185	YB12-185	0.0662	/	2	IGHG1	IGHV3-15	IGHJ4	0.0916031	IGKV1-5	IGKJ2	0.0378378
	186	YB12-186	0.1924	0.0545	1	IGHG1	IGHV3-21	IGHJ2	0.277778	IGLV3-19	IGLJ3	0.135294
	187	YB12-187	2.6349	2.4895	2	IGHG1	IGHV3-21	IGHJ4	0.0349127	IGLV1-40	IGLJ2	0.0177665
	188	YB12-188	0.0942	/	1	IGHG1	IGHV3-23	IGHJ5	0.510101	IGKV3-11	IGKJ4	0.0183246
	189	YB12-189	0.0713	/	1	IGHG1	IGHV3-23	IGHJ3	0.238213	IGKV3-20	IGKJ2	0.0284238
	190	YB12-190	0.0741	/	2	IGHG1	IGHV3-30	IGHJ6	0.0346535	IGLV1-40	IGLJ2	0.0329949
	191	YB12-191	0.0967	/	1	IGHG1	IGHV3-33	IGHJ4	0.193939	IGKV1-16	IGKJ4	0.0489691
	192	YB12-192	0.1051	0.0915	2	IGHG1	IGHV3-33	IGHJ4	0.0648379	IGKV3-20	IGKJ2	0.299479
	193	YB12-193	0.0975	/	2	IGHG1	IGHV3-43	IGHJ6	0.185464	IGKV6-21	IGKJ2	0.0160428
	194	YB12-194	0.1107	0.0625	1	IGHG1	IGHV3-53	IGHJ5	0.276808	IGKV3-15	IGKJ1	0.0156658
	195	YB12-195	2.497	2.5645	2	IGHG1	IGHV3-53	IGHJ6	0.0301508	IGLV3-21	IGLJ2	0.0182768
	196	YB12-196	2.6237	2.578	2	IGHG1	IGHV3-66	IGHJ4	0.106061	IGKV3-20	IGKJ2	0.0180879
	197	YB12-197	2.6549	2.733	2	IGHG1	IGHV3-66	IGHJ4	0.101036	IGLV4-69	IGLJ3	0.0277078
	198	YB12-198	0.3271	0.059	2	IGHG1	IGHV3-66	IGHJ2	0.0803859	IGKV3-20	IGKJ2	0.0620155
	199	YB12-199	2.4158	0.0925	3	IGHG1	IGHV4-39	IGHJ1	0.118932	IGKV3-15	IGKJ1	0.0678851
	200	YB12-200	1.1048	0.2895	2	IGHG1	IGHV4-59	IGHJ4	0.169192	IGKV1D-39	IGKJ3	0.0920716
	201	YB12-201	2.3663	2.4735	2	IGHG1	IGHV4-59	IGHJ4	0.0502513	IGLV6-57	IGLJ2	0.0230179
	202	YB12-202	2.5698	2.677	2	IGHG1	IGHV5-51	IGHJ4	0.104326	IGLV1-44	IGLJ3	0.0102302
	203	YB12-203	2.5802	2.0585	4	IGHG1	IGHV6-1	IGHJ3	0.0240964	IGKV4-1	IGKJ2	0.0348259
	204	YB13-204	2.5966	2.7035	2	IGHG1	IGHV1-2	IGHJ4	0.074813	IGLV3-19	IGLJ2	0.0213333
	205	YB13-205	0.3851	0.0675	1	IGHG1	IGHV1-46	IGHJ5	0.133676	IGLV1-51	IGLJ3	0.0537084
	206	YB13-206	0.9323	0.0725	2	IGHG1	IGHV1-69D	IGHJ4	0.123393	IGKV1-39	IGKJ1	0.0771208
	207	YB13-207	2.6058	2.301	2	IGHG1	IGHV1-69D	IGHJ3	0.0744417	IGLV1-40	IGLJ3	0.0203046
	208	YB13-208	2.5633	2.6425	2	IGHG1	IGHV2-5	IGHJ3	0.101266	IGLV3-25	IGLJ1	0.0186667
	209	YB13-209	2.6371	2.7485	2	IGHG1	IGHV3-15	IGHJ4	0.0540541	IGKV1D-39	IGKJ2	0.0357143
	210	YB13-210	0.0575	/	2	IGHG1	IGHV3-15	IGHJ6	0.0521327	IGKV1D-39	IGKJ2	0.0433673
	211	YB13-211	0.0785	/	1	IGHG1	IGHV3-23	IGHJ4	0.27182	IGKV1D-39	IGKJ4	0.0435897
	212	YB13-212	0.5201	0.0655	2	IGHG1	IGHV3-23	IGHJ4	0.0573566	IGKV1-5	IGKJ1	0.0411311
	213	YB13-213	0.0798	/	3	IGHG1	IGHV3-30	IGHJ5	0.0547264	IGKV3-15	IGKJ1	0.0417755
	214	YB13-214	1.6201	0.054	1	IGHG1	IGHV3-33	IGHJ4	0.196429	IGLV2-14	IGLJ1	0.0675676
	215	YB13-215	1.733	0.055	2	IGHG1	IGHV3-33	IGHJ3	0.084788	IGKV1D-39	IGKJ3	0.0332481
	216	YB13-216	2.5997	2.524	2	IGHG1	IGHV3-33	IGHJ4	0.0776942	IGKV1D-39	IGKJ1	0.0179028
	217	YB13-217	2.717	2.6165	2	IGHG1	IGHV3-33	IGHJ6	0.0745192	IGLV1-44	IGLJ1	0.0282051
	218	YB13-218	0.1949	0.056	2	IGHG1	IGHV3-43	IGHJ4	0.121588	IGLV2-23	IGLJ2	0.0608466
	219	YB13-219	0.9687	0.056	1	IGHG1	IGHV3-48	IGHJ1	0.187661	IGLV1-51	IGLJ2	0.0614525
	220	YB13-220	0.0603	/	2	IGHG1	IGHV3-53	IGHJ4	0.114058	IGKV3-20	IGKJ1	0.0440415
	221	YB13-221	2.7912	2.5975	1	IGHG1	IGHV3-66	IGHJ3	0.0575	IGKV1-5	IGKJ1	0.0257069
	222	YB13-222	0.0805	/	2	IGHG1	IGHV4-30-4	IGHJ6	0.0583942	IGLV3-21	IGLJ2	0.00522193
	223	YB13-223	0.7082	0.087	2	IGHG1	IGHV4-34	IGHJ2	0.0471698	IGKV1D-39	IGKJ2	0.0612245
	224	YB13-224	0.1784	0.4335	2	IGHG1	IGHV5-51	IGHJ3	0.0843672	IGLV2-14	IGLJ3	0.0657534
	225	YB13-225	0.0891	/	2	IGHG1	IGHV5-51	IGHJ3	0.0669975	IGLV4-69	IGLJ2	0.0554156
	226	YB13-226	0.0733	/	3	IGHG1	IGHV7-4-1	IGHJ4	0.0953608	IGKV3-11	IGKJ3	0.0313316
	227	YB13-227	0.0728	/	2	IGHG1	IGHV7-4-1	IGHJ6	0.0456731	IGLV1-47	IGLJ3	0.033419
	228	YB14-228	2.1627	2.3485	2	IGHG1	IGHV1-69D	IGHJ4	0.110276	IGKV1D-39	IGKJ1	0.028133
	229	YB14-229	0.1643	0.087	2	IGHG1	IGHV2-70	IGHJ4	0.216718	IGLV1-51	IGLJ1	0.188791
	230	YB14-230	1.4455	0.0605	2	IGHG1	IGHV3-21	IGHJ6	0.0264423	IGLV3-25	IGLJ2	0.0467836
	231	YB14-231	0.1298	0.0925	5	IGHG1	IGHV3-21	IGHJ4	0.0224439	IGLV2-11	IGLJ2	0.0353535
	232	YB14-232	0.0856	/	1	IGHG1	IGHV3-33	IGHJ4	0.120301	IGKV1-33	IGKJ5	0.0282776
	233	YB14-233	0.1535	0.0555	2	IGHG1	IGHV3-66	IGHJ5	0.121447	IGKV1D-39	IGKJ1	0.0153453
	234	YB14-234	0.7087	0.0575	3	IGHG1	IGHV4-59	IGHJ4	0.0452261	IGLV2-14	IGLJ1	0.0229592
	235	YB15-235	2.5039	1.6955	2	IGHG1	IGHV1-46	IGHJ6	0.0240385	IGKV1D-39	IGKJ5	0.0153453
	236	YB15-236	0.0539	/	1	IGHG1	IGHV3-23	IGHJ4	0.14433	IGKV4-1	IGKJ1	0.032419
	237	YB15-237	0.0808	/	1	IGHG1	IGHV3-23	IGHJ1	0.121134	IGKV3-15	IGKJ5	0.078329
	238	YB15-238	0.6631	0.061	2	IGHG1	IGHV3-23	IGHJ4	0.119701	IGKV3-20	IGKJ1	0.0626703
	239	YB15-239	2.1463	0.058	1	IGHG1	IGHV3-33	IGHJ4	0.214724	IGKV2-30	IGKJ1	0.0527638
	240	YB15-240	0.1687	0.059	2	IGHG1	IGHV4-39	IGHJ4	0.0449173	IGKV3-20	IGKJ3	0.031746
	241	YB15-241	0.2618	0.0535	2	IGHG1	IGHV4-4	IGHJ3	0.0372208	IGKV3-15	IGKJ2	0.015625
	242	YB15-242	1.7366	0.0565	2	IGHG1	IGHV4-59	IGHJ5	0.155388	IGKV3-20	IGKJ4	0.0409836
	243	YB16-243	2.2618	1.3375	2	IGHG1	IGHV1-18	IGHJ3	0.138958	IGLV2-14	IGLJ2	0.0408163
	244	YB16-244	0.0559	/	2	IGHG1	IGHV1-69D	IGHJ6	0.0369458	IGKV1-39	IGKJ2	0.0384615
	245	YB16-245	0.0499	/	1	IGHG1	IGHV3-23	IGHJ1	0.445596	IGKV3-20	IGKJ2	0.175711
	246	YB16-246	1.8103	0.0895	2	IGHG1	IGHV3-23	IGHJ4	0.0947631	IGKV1-5	IGKJ5	0.102828
	247	YB16-247	0.0519	/	1	IGHG1	IGHV3-30	IGHJ5	0.205	IGLV3-25	IGLJ3	0.0586667
	248	YB16-248	0.1005	0.056	2	IGHG1	IGHV3-30	IGHJ5	0.2025	IGKV3-11	IGKJ2	0.0338462
	249	YB16-249	0.0896	/	1	IGHG1	IGHV3-33	IGHJ5	0.20059	IGKV3-11	IGKJ4	0.0157068
	250	YB16-250	0.0906	/	2	IGHG1	IGHV3-33	IGHJ5	0.159021	IGKV1-5	IGKJ1	0.0694087
	251	YB16-251	0.0724	/	9	IGHG1	IGHV3-48	IGHJ6	0.0371287	IGKV1D-39	IGKJ5	0.0383632
	252	YB16-252	0.066	/	6	IGHG1	IGHV4-61	IGHJ5	0.120393	IGLV3-21	IGLJ2	0.0597826
	253	YB4-253	0.1059	2.3549	2	IGHG1	IGHV3-33	IGHJ4	0.0401003	IGLV3-21	IGLJ3	0.0359897
	254	YB4-254	0.1014	3.6846	2	IGHG1	IGHV3-33	IGHJ4	0.032419	IGLV2-14	IGLJ3	0.0154242
	255	YB4-255	0.2361	0.1126	1	IGHG1	IGHV3-53	IGHJ5	0.0598504	IGKV1D-39	IGKJ2	0.0433673
	256	YB4-256	0.1948	3.1329	1	IGHG1	IGHV3-66	IGHJ6	0.0251256	IGLV1-40	IGLJ2	0.0279188
	257	YB9-257	0.1711	0.2696	1	IGHG1	IGHV3-23	IGHJ6	0.136816	IGKV3-20	IGKJ4	0.0233766
	258	YB9-258	3.9067	3.5282	1	IGHG1	IGHV3-53	IGHJ4	0.0477387	IGKV1-12	IGKJ4	0.0335052
	259	YB9-259	0.093	0.0685	1	IGHG1	IGHV3-53	IGHJ1	0.0441558	IGLV1-47	IGLJ2	0.0308483
	260	YB9-260	0.0827	0.1049	1	IGHG1	IGHV4-4	IGHJ4	0.109415	IGLV2-23	IGLJ1	0.015873
	261	YB12-261	0.1108	0.1189	1	IGHG1	IGHV3-21	IGHJ4	0.177945	IGKV3-20	IGKJ1	0.0259067
	262	YB12-262	0.1244	0.1244	1	IGHG1	IGHV3-23	IGHJ2	0.172932	IGKV3-15	IGKJ3	0.0156658
	263	YB12-263	0.1726	2.7425	2	IGHG1	IGHV3-33	IGHJ6	0.0325	IGLV2-14	IGLJ2	0.0204082
	264	YB12-264	0.2424	0.0801	1	IGHG1	IGHV3-53	IGHJ6	0.0532688	IGLV3-1	IGLJ2	0.0271003
	265	YB12-265	0.3789	0.0732	1	IGHG1	IGHV3-53	IGHJ6	0.05	IGKV1-NL1	IGKJ3	0.00543478
	266	YB12-266	3.8782	3.3411	1	IGHG1	IGHV3-53	IGHJ6	0.04	IGKV1-9	IGKJ4	0.0154639
	267	YB12-267	3.7177	3.6164	1	IGHG1	IGHV3-53	IGHJ6	0.0377834	IGLV1-44	IGLJ1	0.285714
	268	YB12-268	0.1377	1.2595	1	IGHG1	IGHV3-53	IGHJ3	0.0375	IGLV2-23	IGLJ3	0.015873
	269	YB12-269	3.3495	3.3537	1	IGHG1	IGHV3-66	IGHJ6	0.104046	IGLV1-40	IGLJ1	0.0456853
	270	YB12-270	0.1616	0.0973	1	IGHG1	IGHV3-66	IGHJ4	0.0351759	IGLV3-25	IGLJ3	0.00533333
	271	YB12-271	0.0821	1.6871	1	IGHG1	IGHV4-4	IGHJ3	0.104218	IGKV1-12	IGKJ3	0.0745501
	272	YB12-272	0.0442	0.0435	2	IGHG1	IGHV4-59	IGHJ6	0.0411622	IGKV2D-29	IGKJ4	0.0377834
	273	YB12-273	0.0523	0.0782	1	IGHG1	IGHV5-51	IGHJ4	0.042394	IGLV3-10	IGLJ2	0.00519481
	274	YB12-274	3.9113	3.4623	1	IGHG1	IGHV5-51	IGHJ5	0.029703	IGKV3-20	IGKJ1	0.0129534
	275	YB13-275	3.5982	3.295	1	IGHG1	IGHV2-5	IGHJ3	0.116456	IGLV3-25	IGLJ1	0.048
	276	YB13-276	3.3892	3.4424	2	IGHG1	IGHV3-15	IGHJ3	0.00488998	IGKV1D-39	IGKJ2	0.012987
	277	YB13-277	0.0428	0.0406	1	IGHG1	IGHV3-33	IGHJ4	0.178571	IGLV8-61	IGLJ3	0.0292553
	279	YB13-279	0.1015	0.1477	1	IGHG1	IGHV3-66	IGHJ6	0.0532688	IGKV3-20	IGKJ3	0.0129534
	280	YB13-280	0.1405	3.2503	1	IGHG1	IGHV4-4	IGHJ5	0.118252	IGKV3-15	IGKJ2	0.0390625
	281	YB13-281	3.5384	3.5138	2	IGHG1	IGHV3-21	IGHJ6	0.0170732	IGLV1-40	IGLJ3	0.0152284
	282	YB14-282	0.1485	0.0877	1	IGHG1	IGHV3-53	IGHJ3	0.04	IGLV3-25	IGLJ2	0.0467836
	283	YB14-283	0.3025	0.9853	1	IGHG1	IGHV3-66	IGHJ4	0.138021	IGLV1-44	IGLJ3	0.0537084
	284	YB14-284	0.2368	2.9583	2	IGHG1	IGHV3-33	IGHJ3	0.0481928	IGLV3-25	IGLJ3	0.0506667
	285	YB14-285	0.1426	3.2386	2	IGHG1	IGHV2-5	IGHJ3	0.00245098	IGLV3-25	IGLJ2	0.0106667
	287	YB16-287	0.1099	1.0123	2	IGHG1	IGHV3-53	IGHJ3	0.1175	IGLV2-14	IGLJ3	0.0720222
	288	YB12-288	0.1092	2.3572	1	IGHG1	IGHV2-5	IGHJ5	0.132678	IGKV3-11	IGKJ2	0.0208333
	289	YB12-289	0.0895	0.2853	1	IGHG1	IGHV2-5	IGHJ4	0.126582	IGLV4-60	IGLJ1	0.05
	291	YB13-291	3.805	3.537	1	IGHG1	IGHV2-5	IGHJ3	0.101266	IGLV3-25	IGLJ1	0.0346667
	292	YB13-292	3.4522	3.4089	1	IGHG1	IGHV3-21	IGHJ3	0.287841	IGKV2-28	IGKJ2	0.0325815
	293	YB4-293	3.7932	3.086	1	IGHG1	IGHV3-66	IGHJ6	0.0399002	IGKV1-9	IGKJ2	0.0179487
	294	YB3-294	3.6648	3.2255	1	IGHG1	IGHV3-53	IGHJ6	0.037594	IGLV1-44	IGLJ3	0.0127877
	295	YB3-295	3.8589	3.4418	1	IGHG1	IGHV3-66	IGHJ6	0.0525	IGKV1-33	IGKJ3	0.0179949
		Note: 1. Color shading represents potent binding antibody
		2. Cut off = 0.2
		3. "/" : not detected

## Sheet:  Table S2
Table S2. Binding affinity, neutralization and sequence features of the 24 selected antibodies.
	Antibody	*Binding: Variants/WT											Binding ability/EC50(ng/mL)									SPR/KD (M)			Pseudovirus Variants (ug/mL)							Authentic Virus(ug/mL)				Heavy chain			Light chain			Heavy chain sequence	Light chain sequence
		WT	Alpha	Beta	Delta	Gamma	Kappa	Lambda	Mu	Omicron		SARS-cov-1	WH	Alpha	Beta	Delta	Gamma	Kappa	Lambda	Mu	Omicron				Abs(con=20ng/mL) IC50			Wuhan	Beta	Delta	Omicron	IC50
		S1	S1	S1	S1	S1	S1	S1	RBD	RBD	ECD	S1	S1	S1	S1	S1	S1	ECD	RBD	RBD	RBD	WT	Delta	Omicron	WT	Beta	Delta	IC50	IC50	IC50	IC50	WT	Delta	Omicron	Beta	V Gene	HCDR3	SHM rate	V Gene	LCDR3	SHM rate
	YB5-60	1	0.655306	1.44103	0.946548	0.598422	0.918817	1.49862	1.08406	0.0268245	0.0176331	0.00616371	0.038535	1.6	4.4	1.6	4.4	1.6	31.3	0.6	/	/	2.679e-09	/	0.853836	0.905965	0.915544	/	/	/	/	/	0.0976562	/	25	IGHV3-33	CACPNPTVTVPVPDWYFDLW	0.0591133	IGLV2-14	CSSYTSNNTVVF	0.023622	MEFGLSWVFLVALLRGVQCQVQLVESGGGVVQPGRSLRVSCAASGFSFSNNAMYWVRQAPGKGLEWVAVISYDGRNKYYADSVKGRSTISRDNSRNTLFLQMNSLRADDTAVYYCACPNPTVTVPVPDWYFDLWGRGTLVIVSSx	MAWALLFLTLLTQGTGSWAQSALTQPASVSGSPGQSITFSCTGTSSDDGDYNYVSWYQQHPGKAPKLIIYDVSNRPSGVSNRFSGSKSGNTASLTISGLQAEDEADYYCSSYTSNNTVVFGGGTKLTVLx
	YB9-102	1	0.896643	1.29851	0.998205	0.739149	0.881386	0.581045	0.182265	1.36342	1.34421	0.0028047	0.046815	1.6	1.6	1.6	1.6	1.6	-	31.3	2.4	/	3.157e-10	1.696e-09	0.786444	0.541125	0.898878	/	/	/	0.304	/	0.390625	/	25	IGHV3-23	CATGELELGTCYFDYW	0.0648379	IGKV1-12	CQQANSFPQAF	0.0231362	EVQLLESGGGLVQPGGSLRLSCTASGFTFRYYAMTWVRQAPGKGLEWVSVIIGSGGDTYYADSVKGRFTISRDNSKNTLYLQMDSLRAEDTAVYYCATGELELGTCYFDYWGQGTLVTVSS	DIQMTQSPSSVSASVGDRVTITCRASQGISSWLAWYQQKPGEAPKLLISAASSLQSGVPSRFSGSGSETDFTLTISSVQPEDFATYYCQQANSFPQAFGQGTKVEIK
	YB9-112	1	1.09052	0.974224	0.938103	1.07368	1.46129	1.36647	0.952522	0.0213572	0.0122041	0.0263721	0.0225	3.90625	3.90625	0.244141	0.976562	0.244141	0.976562	0.976562	/	/	1.179e-09	/	0.468573	0.523042	0.549235	0.246	-	0.107	/	1.32812	0.166016	/	42.5	IGHV3-53	CARDLDYYGMDVW	0.0495049	IGKV1-9	CQHLNSYPPITF	0.0102828	EVRLVESGGGLIQPGGSLRLSCAASGLIVSSNYMTWVRQAPGKGLEWVSVIYSGGSTFYADSVKGRFTISRDNSKNTLFLQMSSLRAEDTAIYYCARDLDYYGMDVWGQGTTVTVSS	DIQLTQSPSFLSASVGDRVTITCRASQGVASYLAWYQQKPGKAPKLLIYAASTLQSGVPSRFSGSGSGTEFTLTISSLQPEDFATYYCQHLNSYPPITFGQGTRLEIK
	YB9-120	1	1.12467	1.29966	0.926685	1.03146	1.43477	1.27587	0.431521	1.20741	1.40886	0.0280138	0.015585	0.976562	0.244141	0.976562	0.244141	0.244141	0.976562	-	40	3.44e-12	1.29e-11	1.81e-08	0.589762	0.543607	0.648817	0.193	0.146	0.063	20	<0.97	0.78125	/	1.5625	IGHV4-4	CARDGGGVGTPLEYW	0.120301	IGLV2-14	CSSFTNTTPVVF	0.0396825	QVQLQESGPGLVKPSGTLSLTCAVSGGSIRTTKWWSWVRQPPGKGLEWIGEIHHGGNTNYNPSLKSRVTISVDKSKNQFSLKLTSVTAADTAVYYCARDGGGVGTPLEYWGQGTLVTVSS	QSGLTQPASVSGSPGQSITISCTGTISDVGAYNYVSWYQQHPGRAPKVVIYDVSERPSGTSNRFSGSKSGNTASLTISGLQAEDEADYYCSSFTNTTPVVFGGGTKLTVL
	YB12-187	1	1.12055	1.26843	0.960826	1.08274	1.53406	1.37129	0.984115	1.33782	1.35376	0.904516	0.01728	62.5	0.244141	0.244141	0.244141	0.244141	3.90625	0.976562	40	/	7.534e-09	/	/	/	/	/	/	/	-	15.625	7.8125	/	125	IGHV3-21	CASGQMYSGSYPSGDYFDYW	0.0349127	IGLV1-40	CQSYDTSLSGVVF	0.0177665	EVQLVESGGGLVKPGGSLRLSCAASGFIFSTYSMNWVRQAPGKGLEWVSSISSFSTYIYYADSVKGRFTISRDNAKNSLYLQMNSLRAEDTAVYYCASGQMYSGSYPSGDYFDYWGQGTLVTVSS	LSVLTQPPSVSGAPGQRVTISCTGSSSNIGADYDVHWYQQLPGTAPKLLIYGNTNRPSGVPDRFSGSKSGTSASLAITGLQAEDEAHYYCQSYDTSLSGVVFGGGTKLTVL
	YB12-195	1	1.14973	0.251541	0.90347	1.04924	1.60314	1.27744	0.852467	0.0330809	0.0137044	0.000217714	0.26235	15.625	62.5	0.976562	0.976562	0.976562	3.90625	0.976562	/	/	6.187e-09	/	/	/	/	/	/	/	/	7.8125	<0.97	/	250	IGHV3-53	CARDLQRDGMDVW	0.0301508	IGLV3-21	CARDLQRDGMDVW	0.0182768	EVQLVESGGGLIQPGGSLRLSCAASGFIVSSNYMNWVRQAPGKGLEWVSVIYSGGSTFYADSVKGRFTISRDNSKNTLYLQMNSLRAEDTAVYYCARDLQRDGMDVWGQGTTVTVSS	SYVLTQPPSVSVAPGKTARITCGGNNIGSKNVHWYQQKPGQAPVLVIYYDSDRPSGIPERFSGSNSGNTATLTVSRVEAGDEADYYCQLWDSSSDHVVFGGGTKLTVL
	YB12-197	1	1.2394	0.807787	0.963002	1.13189	1.88251	1.30497	1.10206	0.352748	0.298908	0.000580673	0.05292	3.90625	3.90625	0.976562	0.976562	0.976562	3.90625	0.976562	/	4.86e-11	3.96e-10	3.97e-07	0.646045	0.613704	0.701814	0.047	0.003	0.008	0.095	0.976562	0.03	0.74075	3.90625	IGHV3-66	CARDAYNYGANW	0.101036	IGLV4-69	CQTWGTDIHWVF	0.0277078	EVQLVESGGGLVQPGGSLRLSCAASGFTVSSNYMNWVRQAPGKGLEWVSVIYSGGSTFYADSVKGRFTISRDNSKNTLYLQMNSLRAEDTAVYYCARDAYNYGANWGQGTLVTVSS	HLVLTQSPSASASLGASVKLTCTLSSGHSNNAIAWHQQQPEKGPRYLMHLNSDGSHTKGDGIPDRFSGSSSGAERYLTISSLQSEDEAEYYCQTWGTDIHWVFGGGTKLTVR
	YB12-202	1	1.12129	1.0416	0.866624	1.03298	1.7304	1.22305	1.01298	1.09084	1.09252	0.00142264	0.056745	15.625	0.244141	0.976562	0.976562	0.244141	3.90625	0.976562	8	/	2.771e-09	/				/	/	/	-	125	15.625	/	125	IGHV5-51	CATTPHLYGGADYW	0.104326	IGLV1-44	CAAWDDSLNGSWVF	0.0102302	EVQLVQSGAEVKKPGESLKISCKGSGYSFISYWIVWVRQMPGKGLEWMGIIYPGDSDTRYSPSFHGQVTISADKSFSTAYLQWSSLKASDTAMYYCATTPHLYGGADYWGQGTLVTVSS	QSVLTQPPSASGTPGQRVTISCSGSTSNIGSNTVNWYQQLPGTAPKLLIYNNNQRPSGVPDRFSGSKSGTSASLAISGLQSEDEADYYCAAWDDSLNGSWVFGGGTKLTVL
	YB12-203	1	0.967216	0.934432	0.754029	0.162784	0.841758	1.32253	0.695311	0.0342491	0.0209158	0.00143086	0.06183	1.6	50	4.4	50	1.6	4.4	1.6	/	/	2.879e-08	/	/	/	/	/	/	/	/	/	6.25	/	25	IGHV6-1	CARDHLRWDIVATSLEAFDIW	0.0240964	IGKV4-1	CQQYHSSLLYTF	0.0348259	QIQLQQSGPGLVEPSQTLSLTCAISGDSVSSISAAWNWIRQSPSRGLEWLGRTYYRSKWYNDYAVSVKSRITINPDTSKNQFSLHLNSVTPEDTAVYYCARDHLRWDIVATSLEAFDIWGQGTMVTVSS	DIVMTQSPDSLAVSLGERATINCKSSQSVLFSSNNKNSLAWYQQKPGQPPKLLIYWASTRESGVPDRFSGSGSGTDFTLTISSLQAEDVAVYYCQQYHSSLLYTFGQGTKLEIK
	YB13-208	1	1.27371	1.35818	0.984905	1.06879	1.90155	1.38353	1.0627	0.0252329	0.0156168	0.00436778	0.028755	3.90625	0.976562	0.976562	0.976562	0.244141	3.90625	0.976562	/	7.17e-11	8.33e-10	4.17e-12	0.702352	0.830204	0.879857	0.026	0.004	0.004	20	<0.97	0.195312	/	0.195312	IGHV2-5	CAHPRYYGDSSGYYWIW	0.101266	IGLV3-25	CQSADSSGFYVF	0.0186667	QITLKESGPTLVKPTQTLTLTCTFSGLSLSTSGVSVGWIRQPPGKAPEWLALIYWDDDKRYSPSLTSRLSITKDTSKNQVVLTMTNMDPVDTATYYCAHPRYYGDSSGYYWIWGQGTMVTVSS	SYELTQPPSVSVSPGQTARITCSGDALPKQYAYWYQQKPGQAPVVVMYKTSERPSGIPERFSGSSSGTTVTLTISGVQAEDEADYYCQSADSSGFYVFGTGTQVTVL
	YB13-209	1	0.926227	1.25888	0.981432	0.831566	0.873344	1.37029	1.1057	1.28534	1.15926	0.00139484	0.047805	1.6	1.6	1.6	1.6	1.6	1.6	0.6	/	/	9.857e-11	/	/	/	/	/	/	/	1.22	/	6.25	/	12.5	IGHV3-15	CTTGYNWHYGIEYW	0.0540541	IGKV1D-39	CQQSYSTPDTF	0.0357143	EVQLVESGGGLVKPGGSLKLSCAASGFSFVNAWMSWVRQAPGKGLEWVGRIKDKIDGGTTDYAAPVKGRFSISRDDSKNMLYLQMTSLKTEDTAVYYCTTGYNWHYGIEYWGQGTLVTVSS	DIQMTQSPSSLSASVGDRVTVTCRASQSINSYLNWYQQKPGKAPKLLIYAASSLQSGVPSRFSGSGSGTDFTLTISSLQAEDFATYYCQQSYSTPDTFGQGTKLEIK
	YB13-216	1	1.1179	1.39943	0.963359	0.897901	1.10443	1.44466	1.25935	1.33015	1.25767	1.26458	0.14262	0.6	1.6	0.6	1.6	1.6	1.6	0.6	/	/	2.481e-12	2.328e-09	/	/	/	/	/	/	-	/	12.5	/	12.5	IGHV3-33	CARDEGTTVTFFDYW	0.0776942	IGKV1D-39	CQQSYSTPPWTF	0.0179028	QVQLVESGGGVVQPGSSLRISCAASGFTFSSYGMHWVRQGPGKGLEWVAVIWDDGSGKHYAVSVKGRFTISRDNSKNTLYLQMNSLRVEDTAVYYCARDEGTTVTFFDYWGQGTLVTVSS	DIQMTQSPSSLSASVGDRITITCRASQSIRTYLNWYQQKPGKAPKLLIYTSSSLQSGVPSRFSGSGSGTDFTLTISSLQPEDFATYFCQQSYSTPPWTFGQGTKVEIK
	YB13-217	1	0.888551	1.33967	0.948007	0.79029	0.966232	1.34004	1.15725	0.974094	0.545725	1.15649	0.05571	1.6	1.6	0.6	1.6	0.6	0.6	0.6	/	/	7.979e-14	/	/	/	/	/	/	/	-	/	1.5625		3.125	IGHV3-33	CAREEGGSRMYHYYYGMDVW	0.0745192	IGLV1-44	CAAWDDSVSSYVF	0.0282051	QVQLVESGGGVVQPGKSLRLSCTASGFTFSSHSMHWVRQAPGKGLDWVAVISFDGTKNYFADSLKGRFSVSRDNSRNTLYLQMNSLRVEDTAVYYCAREEGGSRMYHYYYGMDVWGQGTTVTVSS	QSVLTQPPSASGTPGQRVTISCSGSSSNIGTNTVNWYQQLPGTAPKLLIYTNNQRPSGVPDRFSGSKSGTSASLAIGGLQSEDEADYYCAAWDDSVSSYVFGTGTQVTAL
	YB13-221	1	1.14211	1.27228	0.906157	1.00694	1.8383	1.26321	0.946137	0.0275597	0.014652	0.0109018	0.100725	3.90625	0.976562	0.976562	0.976562	0.976562	3.90625	0.976562	/	/	1.025e-08	/	0.468359	0.889737	0.774359	0.185	0.649	0.675	/	0.976562	1.5625	/	1.5625	IGHV3-66	CARDSPYRTGWFLGQSDAFDIW	0.0575	IGKV1-5	CQQYNSYPPSF	0.0257069	EVQLVESGGGLVQPGGSLRLSCAASGFIVSSRYMSWVRQAPGKGLEWVSVIYSDGRSYYADSVKGRFIISRDNFKNALYLQMNSLRAEDTAVYYCARDSPYRTGWFLGQSDAFDIWGQGTMVTVSS	DIQMTQSPSTLSASVGDRVTITCRASQSISSWLAWYQQKPGKAPNLLIYKASSLESGVPSRFSASGSGTEFTLTISSLQPDDFATYYCQQYNSYPPSFGQGTKVEIK
	YB9-258	1	1.23557	1.25162	1.11878	1.1087	1.14523	0.988363	0.976725	1.31269	1.05067	0.0854896	0.072105	/	3.9765	0.28455	/	/	/	/	30	1.798e-10	3.907e-12	6.058e-09	0.264256	0.683822	0.535315	0.238	0.161	0.02	0.04	/	0.02745	0.0412	/	IGHV3-53	CARGLGDYLDSW	0.0477387	IGKV1-12	CQQANSVLALTF	0.0335052	EVQLVESGGGLIQPGGSLRLSCAASGLTVSSNYMHWVRQAPGKGLEWVSVLYAGGSAFYADSVKGRFTISRNNSKNTLYLQMNSLRAEDTAIYYCARGLGDYLDSWGQGTLVTVSS	DIQMTQSPSSVSASVGDRVTITCRASQGIGSWLAWYQQKPGKAPQLLIYAASTLQSGVPPRFSGSGSGTDFTLTITSLQPEDFASYYCQQANSVLALTFGGGTKVEIK
	YB12-266	1	0.993905	0.579584	1.00815	1.07601	1.07326	1.01358	1.00359	0.0270662	0.0118584	0.0860565	/	/	/	/	/	/	/	/	/	/	2.416e-09	/	0.632286	0.525169	0.668938	/	/	/	/	/	/	/	/	IGHV3-53	CARDLVVYGMDVW	0.04	IGKV1-9	CQLLNSYPLTF	0.0154639	EVQLVESGGGLIQPGGSLRLSCAASGLTVSSNYMSWVRQAPGKGLEWVSLIYSGGTTSYADSVKGRFTISRDNSKNTLYLQMNSLRVEDTAVYYCARDLVVYGMDVWGQGTTVTVSS	AIQLTQSPSSLSASVGDRVTITCRASQGISSYLAWYQQKPGKAPKLLIYAASTLQSGVPSRFSGSGSGTDFTLTISSLQPEDFATYYCQLLNSYPLTFGGGTKVEIK
	YB12-267	1	1.0852	0.998197	1.05192	1.04669	1.19445	0.902906	1.01943	0.510079	0.36915	0.0212921	/	/	/	/	/	/	/	/	/	/	5.684e-10	/	0.702778	0.620647	0.706505	/	/	/	/	/	/	/	/	IGHV3-53	CARDLMEVGGMDVW	0.0377834	IGLV1-44	CQLLNSYPLTF	0.285714	KVQLVESGGGLIQPGGSLRLSCAASGLTVSSNYMNWVRQAPGKGLEWVSLIFSGGSTYYADSVKGRFTISRDYSKNTLYLQMNSLRAEDTAVYYCARDLMEVGGMDVWGQGTTVTVSS	QSVLTQPPSASGTPGQRVTISCSGSSSYIGSIYWYQQLPGAAPKLLVFSDHKRPSGVPDRFSGSKSGTSASLAISGLQSEDEAGYYCATWDDSLNGYVFGTGTKVTVL
	YB12-269	1	1.19638	1.04126	0.974545	1.00288	1.12507	0.792782	0.920059	0.719437	0.68509	0.0807544	0.14262	/	0.58815	0.1884	/	/	/	/	/	1.201e-09	3.952e-09	4.039e-08	0.621654	0.508991	0.666512	/	/	/	0.051	/	/	/	/	IGHV3-66	CARDEGPGMDVW	0.104046	IGLV1-40	CQSYDSRLSGYVF	0.0456853	EVQLVESGGALVRPGGSLRVSCAASGITVNFNYMTWVRQGPGKGLEWVASIYPGGSTFYADSVKGRFTISRDNSKNTLYLQMTSVRDEDTALYYCARDEGPGMDVWGQGTTVTVSS	QSVLTQPPSVSGAPGQRVTISCTGYSSNIEAGSDVHWYQQPPGTAPKLLIYNNNNRPSGVPDRFSGSKSGTSASLAITGLQPGDEGDYYCQSYDSRLSGYVFGTGTKVTVL
	YB12-274	1	1.22825	1.38527	1.39474	1.31888	1.13648	1.07589	1.22386	0.0175234	0.0135353	0.0408476	0.04593	/	2.1555	0.34545	/	/	/	/	/	/	4.255e-09	/	0.578886	0.406684	0.452424	/	/	/	/	/	/	/	/	IGHV5-51	CARQGDYVWGTSVYSGWFDPW	0.029703	IGKV3-20	CQQYGSSPTF	0.0129534	EVQLVQSGAEVKKSGESLKISCKGSGYRFTSYWIAWVRQMPGKGLEWMGIIYPGDSDTRYSPSFQGQVTISADNSISTAYLQWSSLKAADTAMYYCARQGDYVWGTSVYSGWFDPWGQGTLVTVSS	EIVLTQSPGTLSLSPGERATLSCRASQSVSSSYLAWYQQKPGQAPSLLIYGASSRATGIPDRFSGSGSGTDFTLTISRLEPEDFAVYYCQQYGSSPTFGQGTKVEIK
	YB13-275	1	1.28593	1.4591	1.12858	1.06128	1.23164	1.04268	1.05662	0.0286341	0.0144198	0.0265105	/	/	/	/	/	/	/	/	/	/	/	/	0.472949	0.787217	0.77172	/	/	/	/	/	/	/	/	IGHV2-5	CIHPRFYSDPSGYYFIW	0.116456	IGLV3-25	CQSADNSGFYVF	0.048	QITLKESGPRLVKPTQTLTLTCTFSGFSLATAGMSVGWIRQPPGKALEWLALIYWDDDDRYSPSLKSRLTITKDTSRNQVVLTMTNMDPVDTATYYCIHPRFYSDPSGYYFIWGQGTMVTVSS	SYELTQPPSVSVSPGQTARITCSGDALAKQYAYWYQQKPGQAPVQVMYKDGERPSGIPERFSGSKSGTTVTLTISAVQAEDEADYFCQSADNSGFYVFGTGTQVTVL
	YB13-281	1	1.12128	1.08622	0.99201	1.00392	1.14985	0.879704	1.01584	1.03012	1.13532	0.68928	0.043065	/	0.91005	0.03246	/	/	/	/	30	2.13e-10	5.67e-13	2.83e-09	0.362908	0.481876	0.450422	/	/	/	0.06	/	0.02745	0.74075	/	IGHV3-21	CARVSSKDYYDRSGYLRGDYDYGMDVW	0.0170732	IGLV1-40	CQSYDSSLSGVF	0.0152284	EVQLVESGGGLVKPGGSLRLSCAASGFTFSSYSMNWVRQAPGKGLEWVSSISSSSSYIHYADSVKGRFTISRDNAKNSLYLQMNSLRAEDTAVYYCARVSSKDYYDRSGYLRGDYDYGMDVWGQGTTVTVSS	QSVLTQPPSVSGAPGQRVTISCTGNSSNIGAAYDVHWYQQLPGTAPKLLIYGNSNRPSGVPDRFSGSKSGTSASLAITGLQAEDEADYYCQSYDSSLSGVFGGGTKLTVL
	YB13-291	1	1.21325	1.41027	1.20836	1.19371	1.07584	0.999761	1.18585	0.034676	0.0182775	0.0552082	/	/	/	/	/	/	/	/	/	/	9.303e-10	/	0.674647	0.878872	0.884376	/	/	/	/	/	/	/	/	IGHV2-5	CAHPRYFSDNSAYYWIW	0.101266	IGLV3-25	CQSADSSGFYVF	0.0346667	QITLKESGPTLVKPTQTLTLTCTFSGFSLNTAGVAVGWIRQPPGKAREWLALIYWDDDQRYSPSLESRLTITKDTSKNLVVLTMTNMDPVDTATYYCAHPRYFSDNSAYYWIWGQGTMVTVSS	SYDLTQPPSVSVSPGQTATISCSGDALPKQYVYWYQQKPGQAPVLVIYKDSERPSGIPERFSGSNSGTTVTLTISGVQAEDEAEYYCQSADSSGFYVFGSGTQVTVL
	YB13-292	1	1.21552	1.0899	1.03319	0.800843	1.06204	0.387707	1.02897	1.23674	1.11787	0.0248833	0.057705	/	5.0535	61.95	/	/	/	/	2.4	8.199e-11	6.393e-10	3.113e-09	0.363498	0.46049	0.636469	0.034	0.009	0.02	0.04	/	<0.004	0.08235	/	IGHV3-21	CARTRSRSVRNCTSATCPVDAFDLW	0.287841	IGKV2-28	CMQALQTPYTF	0.0325815	EVQLVESGGGLVKPGGSLRLSCAASGFSFITYNMNWVRQAPGKGLEWVSSISSNILSSTSYIYYADSVKGRFTISRDDAANSLFLQMNSLRVEDTAQYYCARTRSRSVRNCTSATCPVDAFDLWGQGTMVIVSS	DIVLTQSPLSLPVTPGEPASISCRSSQSLLRSNGYNYLDWYLQKPGQSPHLLIYLGSNRASGVPDRFSGSGSGTDFTLKISRVEAEDVGVYYCMQALQTPYTFGQGTNLEIK
	YB4-293	1	1.36135	0.764576	0.949451	1.04526	1.15586	0.822632	1.0595	0.783312	0.923792	0.0135987	0.2415	/	1.584	0.15525	/	/	/	/	/	3.688e-11	1.34e-11	/	0.429359	0.4812	0.51296	/	/	/	0.284	/	/	/	/	IGHV3-66	CARDLIDYGMDVW	0.0399002	IGKV1-9	CQQLNSYLYTF	0.0179487	MEFGLSWVFLVAILKGVQCEVQLVESGGGLVQPGGSLRLSCAASGVTVSRNYMSWVRQAPGKGLEWVSLIYAGGSTYYADSVKGRFTISRDNSKNTLYLQMNSLRAEDTAVYYCARDLIDYGMDVWGQGTTVTVSSx	MDMRVPAQLLGLLLLWLPGARCDIQLTQSPSFLSASVGDRVTITCRASQGISSYLAWYQQKPGKAPNLLIYAASTLQSGVPSRFSGSGSGTEFTLTISSLQPEDFATYYCQQLNSYLYTFGQGTKLEIKx
	*Binding to the spike of SARS-CoV-2 WT, variants, and SARS-CoV-1 is normalized to WT S1.
	"/": not detected
